# Supplementary material for: Liver Cirrhosis, Not Antiviral Therapy, Predicts Clinical Outcome in Cohorts with Heterogeneous Hepatitis B Viral Status
Source: PubMed Central journal article supplement — Gut Liver. 2019 Feb 12;13(2):197–205. doi: 10.5009/gnl18204 (PMC6430437; doi:10.5009/gnl18204), 2019-02-12
Supplement: GNL-13-197_suppl.pdf [file GNL-13-197_suppl.pdf]

**Supplementary Table 1.** Comparison of Baseline Characteristics between Patients with and without AVT Initiation during the Study Period

| Variable                           | AVT initiation during the study period<br>(n=491, 41.0%) | No AVT during the study period<br>(n=707, 59.0%) | p-value |
|------------------------------------|----------------------------------------------------------|--------------------------------------------------|---------|
| Demographic                        |                                                          |                                                  |         |
| Age, yr                            | 48.1±11.3                                                | 49.5±12.1                                        | 0.055   |
| Male sex                           | 290 (59.1)                                               | 386 (54.6)                                       | 0.139   |
| Diabetes mellitus                  | 49 (10.0)                                                | 71 (10.0)                                        | 1.000   |
| Cirrhosis                          | 206 (42.0)                                               | 135 (19.1)                                       | <0.001  |
| Laboratory                         |                                                          |                                                  |         |
| α-Fetoprotein, ng/mL               | 10.5±35.5                                                | 4.4±15.3                                         | <0.001  |
| HBeAg positivity                   | 204 (41.5)                                               | 73 (10.3)                                        | <0.001  |
| HBV DNA, logIU/mL                  | 4.2±2.5                                                  | 2.9±1.9                                          | <0.001  |
| Aspartate aminotransferase, IU/L   | 62.0±100.6                                               | 28.4±20.5                                        | <0.001  |
| Alanine aminotransferase, IU/L     | 81.3±162.2                                               | 33.6±30.4                                        | <0.001  |
| Serum albumin, g/dL                | 4.3±0.4                                                  | 4.4±0.3                                          | <0.001  |
| Total bilirubin, mg/dL             | 0.9±0.5                                                  | 0.8±0.4                                          | 0.032   |
| Platelet count, 10 <sup>9</sup> /L | 162±59                                                   | 192±60                                           | <0.001  |

Data are presented as mean±SD or number (%).

AVT, antiviral therapy; HBeAg, hepatitis B e antigen; HBV, hepatitis B virus.

**Supplementary Table 2.** HRs of Hepatocellular Carcinoma Development by Ongoing Antiviral Therapy and Differently Adjusted Models at Each Institution

| Model             | HR    | 95% CI      | p-value |
|-------------------|-------|-------------|---------|
| Yonsei University |       |             |         |
| Unadjusted        | 1.191 | 0.674–2.107 | 0.547   |
| Adjusted          |       |             |         |
| Model 1           | 1.133 | 0.640–2.004 | 0.668   |
| Model 2           | 1.140 | 0.644–2.017 | 0.653   |
| Model 3           | 0.896 | 0.503–1.596 | 0.709   |
| Model 4           | 1.012 | 0.516–1.987 | 0.972   |
| CHA University    |       |             |         |
| Unadjusted        | 2.189 | 1.079–4.443 | 0.030   |
| Adjusted          |       |             |         |
| Model 1           | 2.265 | 1.113–4.611 | 0.024   |
| Model 2           | 2.217 | 1.089–4.514 | 0.028   |
| Model 3           | 1.710 | 0.839–3.485 | 0.139   |
| Model 4           | 1.586 | 0.700–3.594 | 0.270   |

HR, hazard ratio; CI, confidence interval; HBeAg, hepatitis B e antigen; HBV, hepatitis B virus.

Model 1, age and gender; model 2, model 1 + diabetes mellitus; model 3, model 2 + cirrhosis; model 4, model 3 +  $\alpha$ -fetoprotein, HBeAg positivity, HBV DNA, aspartate aminotransferase, alanine aminotransferase, serum albumin, total bilirubin, and platelet count.

**Supplementary Table 3.** HRs of Hepatocellular Carcinoma Development by Cirrhosis and Differently Adjusted Models

| Model                  | With ongoing AVT at enrollment |              |         | Without ongoing AVT at enrollment |              |         |
|------------------------|--------------------------------|--------------|---------|-----------------------------------|--------------|---------|
|                        | HR                             | 95% CI       | p-value | HR                                | 95% CI       | p-value |
| All study participants |                                |              |         |                                   |              |         |
| Unadjusted             | 7.810                          | 3.272–18.642 | <0.001  | 8.602                             | 4.115–17.985 | <0.001  |
| Adjusted               |                                |              |         |                                   |              |         |
| Model 1                | 6.060                          | 2.511–14.624 | <0.001  | 7.424                             | 3.542–15.562 | <0.001  |
| Model 2                | 6.120                          | 2.538–14.761 | <0.001  | 7.451                             | 3.552–15.628 | <0.001  |
| Model 3                | 5.322                          | 2.049–13.822 | 0.001   | 5.008                             | 2.166–11.581 | <0.001  |
| Model 4                | 5.391                          | 2.051–14.173 | 0.001   | 4.184                             | 1.771–9.883  | 0.001   |

HR, hazard ratio; AVT, antiviral therapy; CI, confidence interval; HBeAg, hepatitis B virus e antigen; HBV, hepatitis B virus.

Model 1, age and gender; model 2, model 1 + diabetes mellitus; model 3, model 2 +  $\alpha$ -fetoprotein, HBeAg positivity, HBV DNA, aspartate aminotransferase, alanine aminotransferase, serum albumin, total bilirubin, and platelet count; model 4, model 3 + institution.

**Supplementary Table 4.** HRs of Hepatocellular Carcinoma Development by Cirrhosis and Differently Adjusted Models at Each Institution

| Model             | HR     | 95% CI       | p-value |
|-------------------|--------|--------------|---------|
| Yonsei University |        |              |         |
| Unadjusted        | 4.795  | 2.327–9.883  | <0.001  |
| Adjusted          |        |              |         |
| Model 1           | 4.435  | 2.152–9.142  | <0.001  |
| Model 2           | 4.405  | 2.137–9.082  | <0.001  |
| Model 3           | 3.382  | 1.487–7.694  | 0.004   |
| Model 4           | 3.380  | 1.485–7.694  | 0.004   |
| Model 5           | 2.228  | 0.966–5.141  | 0.060   |
| CHA University    |        |              |         |
| Unadjusted        | 14.021 | 5.770–34.070 | <0.001  |
| Adjusted          |        |              |         |
| Model 1           | 11.347 | 4.616–27.889 | <0.001  |
| Model 2           | 11.336 | 4.611–27.867 | <0.001  |
| Model 3           | 7.868  | 2.764–22.396 | <0.001  |
| Model 4           | 7.550  | 2.652–21.496 | <0.001  |
| Model 5           | 7.237  | 2.541–20.605 | <0.001  |

HR, hazard ratio; CI, confidence interval; HBeAg, hepatitis B e antigen; HBV, hepatitis B virus; AVT, antiviral therapy.

Model 1, age and gender; model 2, model 1 + diabetes mellitus; model 3, model 3 +  $\alpha$ -fetoprotein, HBeAg positivity, HBV DNA, aspartate aminotransferase, alanine aminotransferase, serum albumin, total bilirubin, and platelet count; model 4, model 3 + AVT at enrollment; model 5, model 4 + AVT after enrollment.

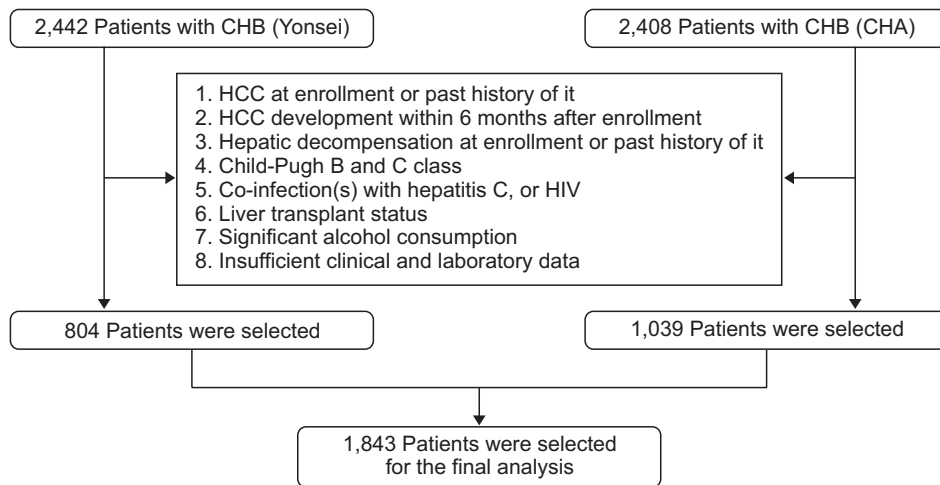

**Supplementary Fig. 1.** Flow diagram of the study population selection. A total of 4,850 patients with chronic hepatitis B (CHB) were recruited. After excluding 3,007 patients according to our exclusion criteria, 1,843 patients were selected for statistical analysis. HCC, hepatocellular carcinoma; HIV, human immunodeficiency virus.

**A**

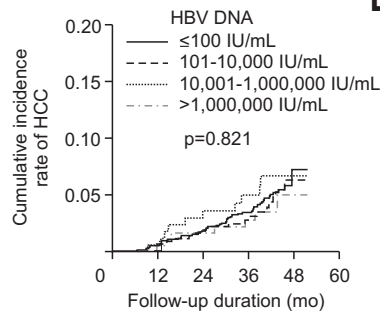

|                                |     | No. at risk |     |     |    |   |
|--------------------------------|-----|-------------|-----|-----|----|---|
| HBV DNA ≤ 100 IU/mL            | 986 | 956         | 892 | 486 | 50 | 0 |
| HBV DNA 101-10,000 IU/mL       | 470 | 440         | 380 | 316 | 26 | 0 |
| HBV DNA 10,001-1,000,000 IU/mL | 178 | 173         | 160 | 135 | 12 | 0 |
| HBV DNA > 1,000,000 IU/mL      | 209 | 195         | 179 | 151 | 13 | 0 |

**B**

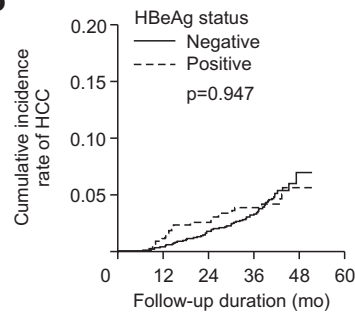

|                |       | No. at risk |       |       |    |   |
|----------------|-------|-------------|-------|-------|----|---|
| HBeAg negative | 1,390 | 1,335       | 1,212 | 1,052 | 73 | 0 |
| HBeAg positive | 453   | 429         | 399   | 353   | 28 | 0 |

**C**

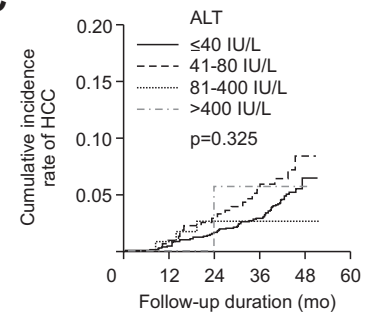

|                 |       | No. at risk |       |       |    |   |
|-----------------|-------|-------------|-------|-------|----|---|
| ALT ≤ 40 IU/L   | 1,364 | 1,306       | 1,203 | 1,605 | 75 | 0 |
| ALT 41-80 IU/L  | 338   | 321         | 288   | 240   | 19 | 0 |
| ALT 81-400 IU/L | 123   | 119         | 103   | 86    | 6  | 0 |
| ALT > 400 IU/L  | 18    | 18          | 17    | 15    | 1  | 0 |

**Supplementary Fig. 2.** Cumulative incidence rates of hepatocellular carcinoma (HCC) based on stratified HBV DNA level (A), HBeAg (B), and stratified ALT level (C). (A) The cumulative HCC incidence rates were not significantly different based on the stratified HBV DNA level ( $p=0.821$  by log-rank test; HBV DNA  $\leq 100$  IU/mL vs 101–10,000 IU/mL vs 10,001–1,000,000 IU/mL vs  $>1,000,000$  IU/mL). (B) The cumulative HCC incidence rates were not significantly different based on the HBeAg status ( $p=0.947$  by log-rank test). (C) The cumulative HCC incidence rates were not significantly different based on the stratified ALT level ( $p=0.325$  by log-rank test; ALT  $\leq 40$  IU/L vs 41–80 IU/L vs 81–400 IU/L vs  $>400$  IU/L). HBV, hepatitis B virus; HBeAg, hepatitis B e antigen; ALT, alanine aminotransferase.
